# Supplementary material
Source: MDPI journal article supplement (https://www.mdpi.com/2311-7524/9/10/1160)
Supplement: s1 [file s1]

## SUPPLEMENTARY MATERIALS

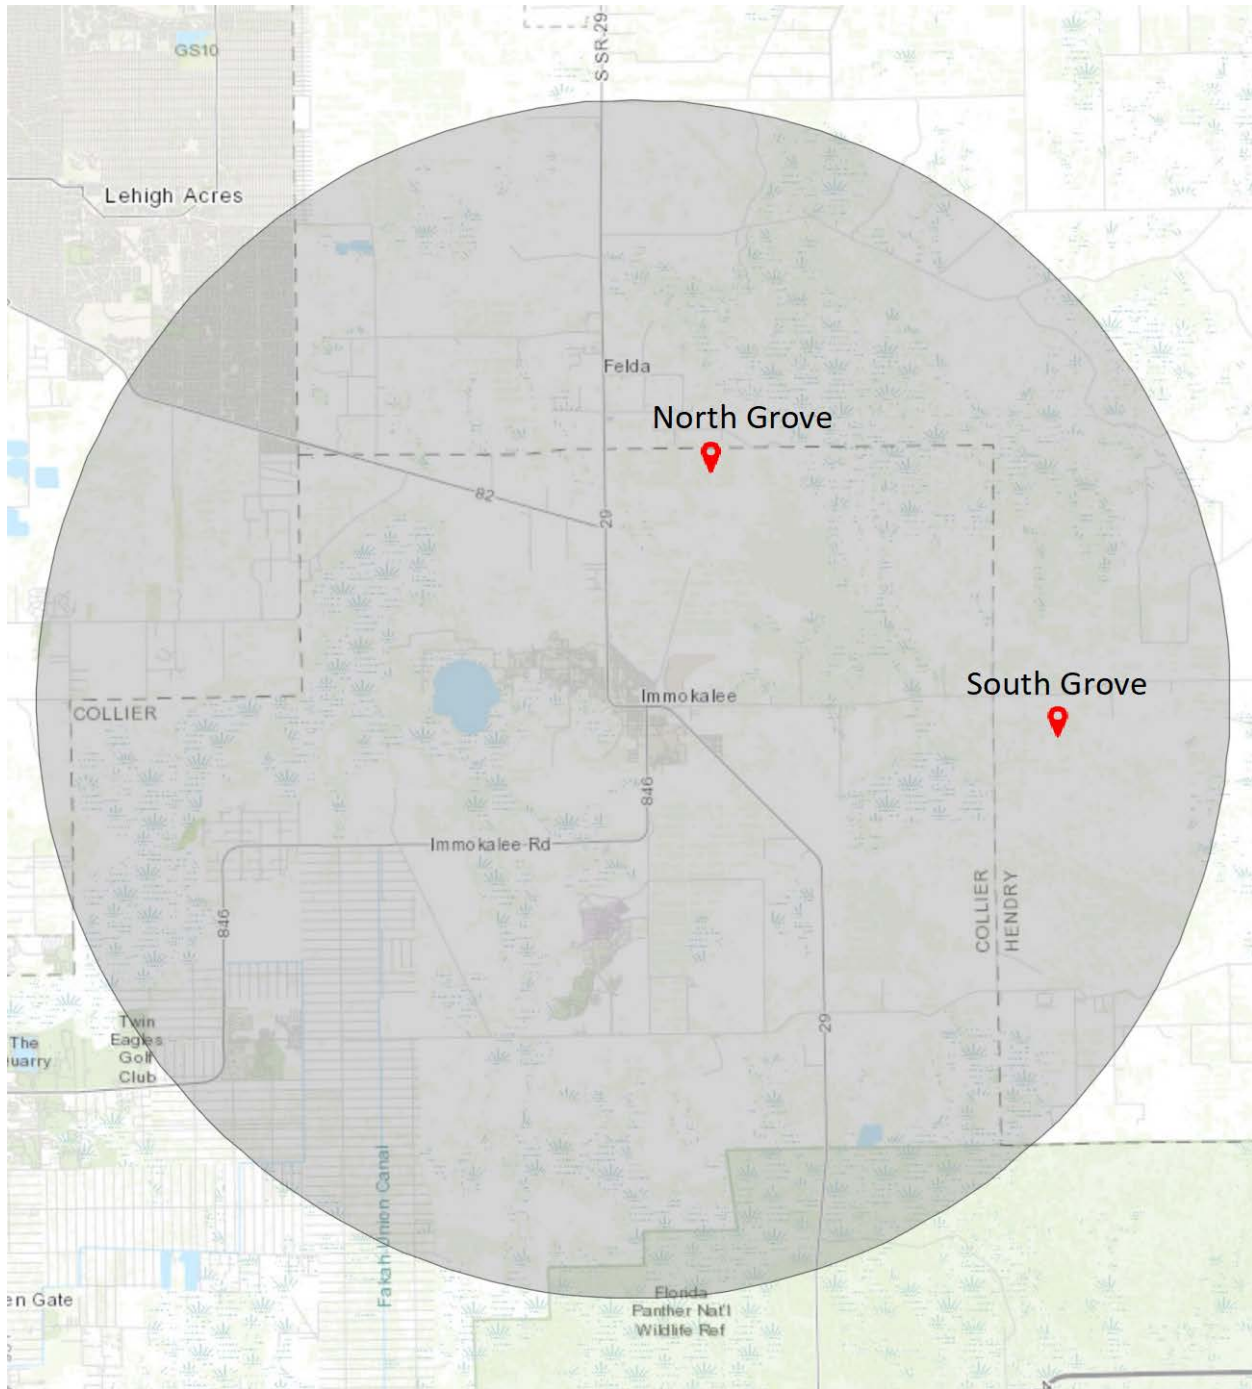

Figure S1: The geographic location of North Grove and South Grove. The approximate distance between groves is 32 km. Collier County, Immokalee, Florida, US. Source: National Oceanic and Atmospheric Administration (NOAA).

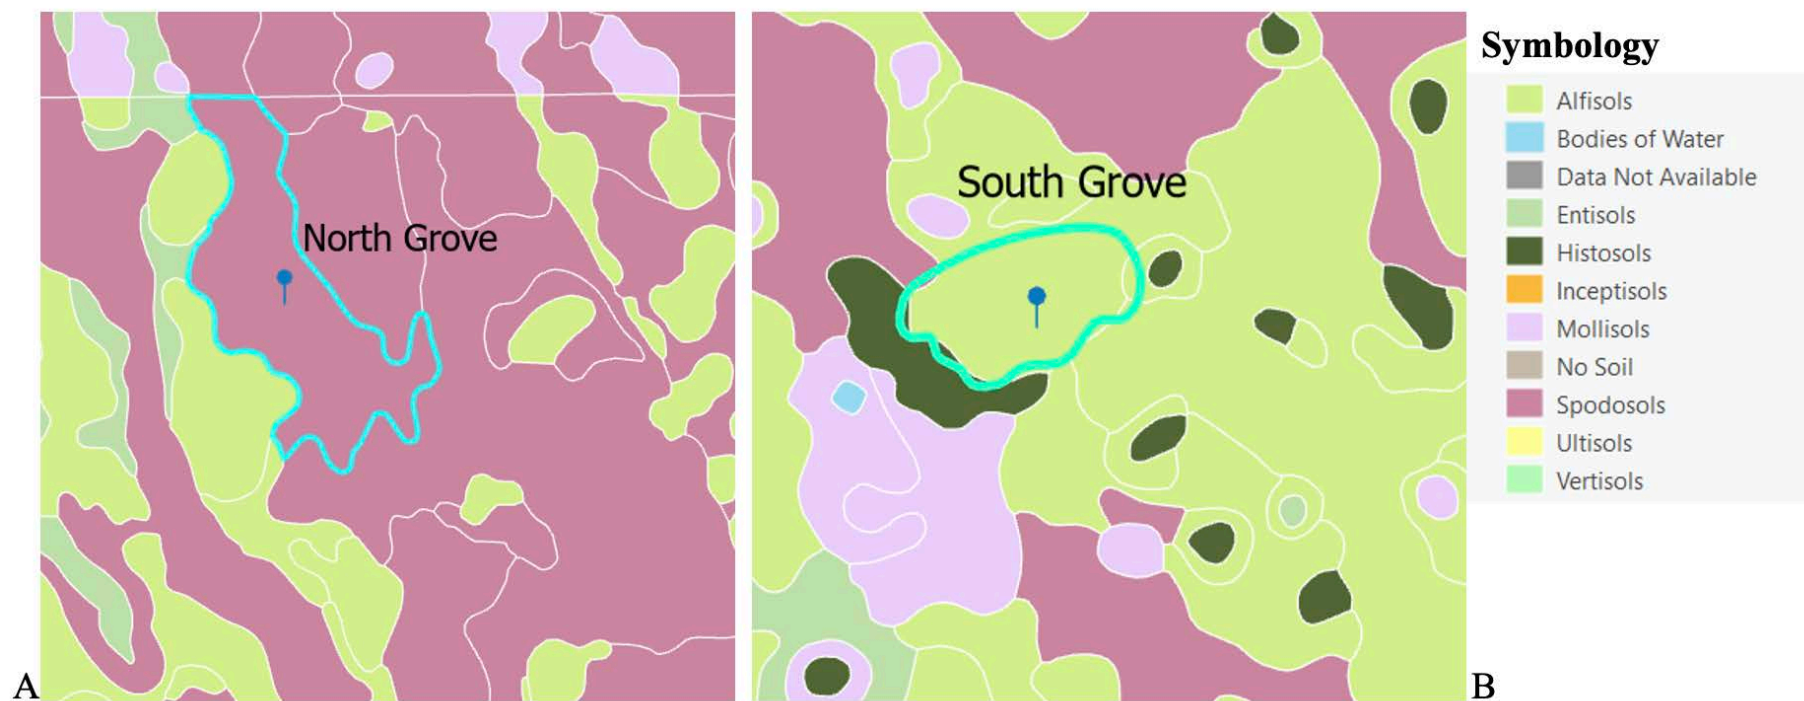

Figure S2: Soil order for each site (North and South Grove). A) North Grove soil order – Spodosol. B) South Grove soil order – Alfisol. Source: United States Department of Agriculture (USDA)- Natural Resources Conservation Service (NRCS), Environmental Systems Research Institute, Inc. (Esri). Software: ArcGIS Pro version 3.0.1



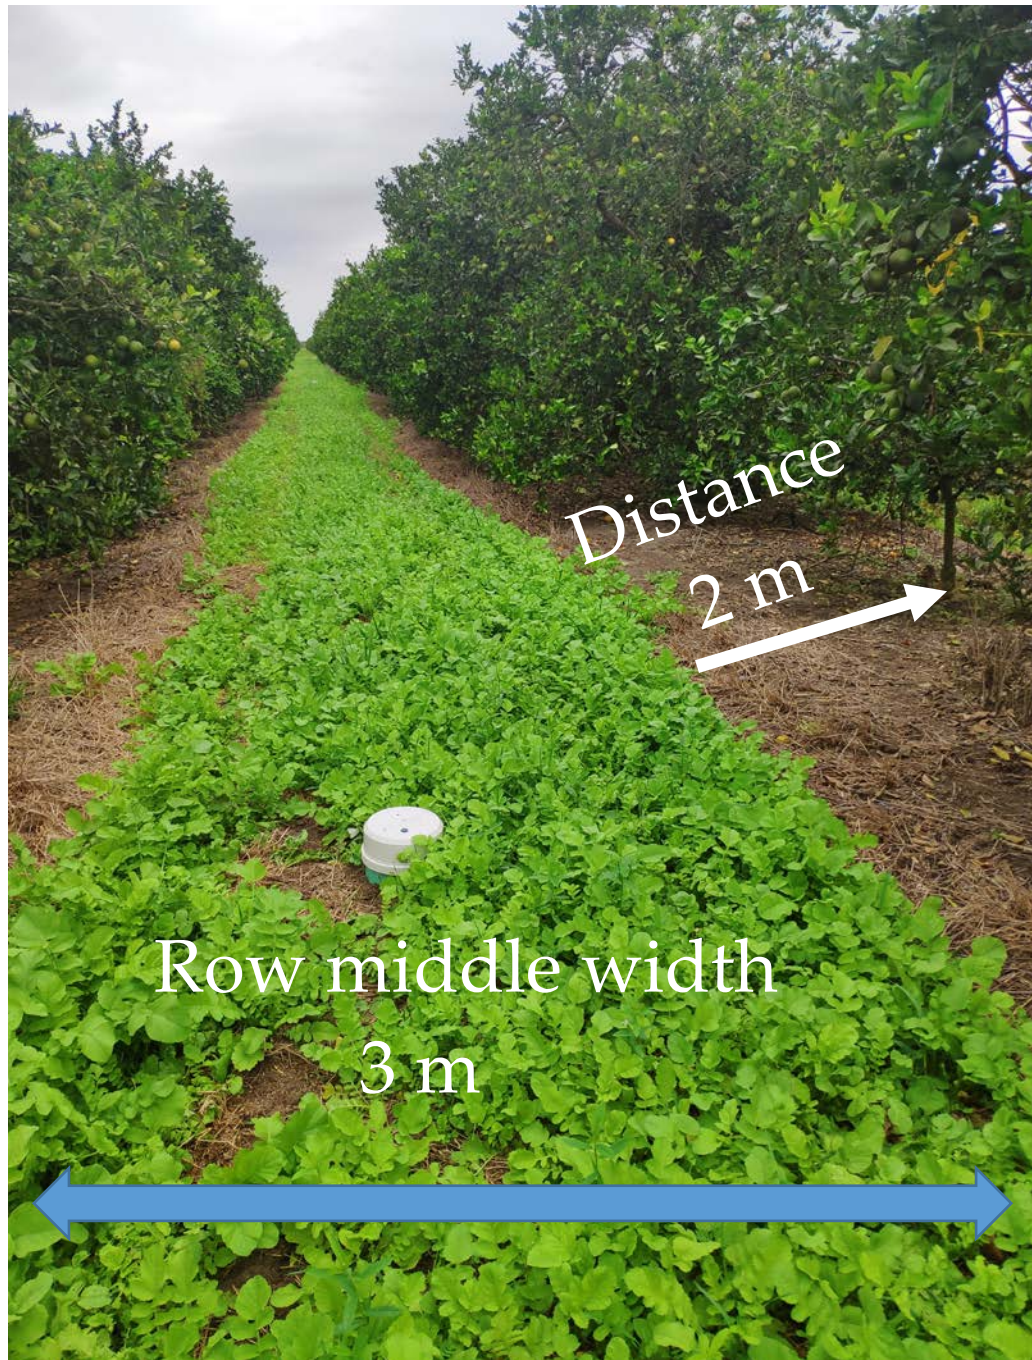

Figure S3: North Grove site. Cover crops were only planted in the row middle area. The row middle width was 3 m, and the distance from the row middle to the trunk of the citrus trees was 2 m. Photo courtesy of Dr. Sarah Strauss and Dr. Antonio Castellano-Hinojosa.

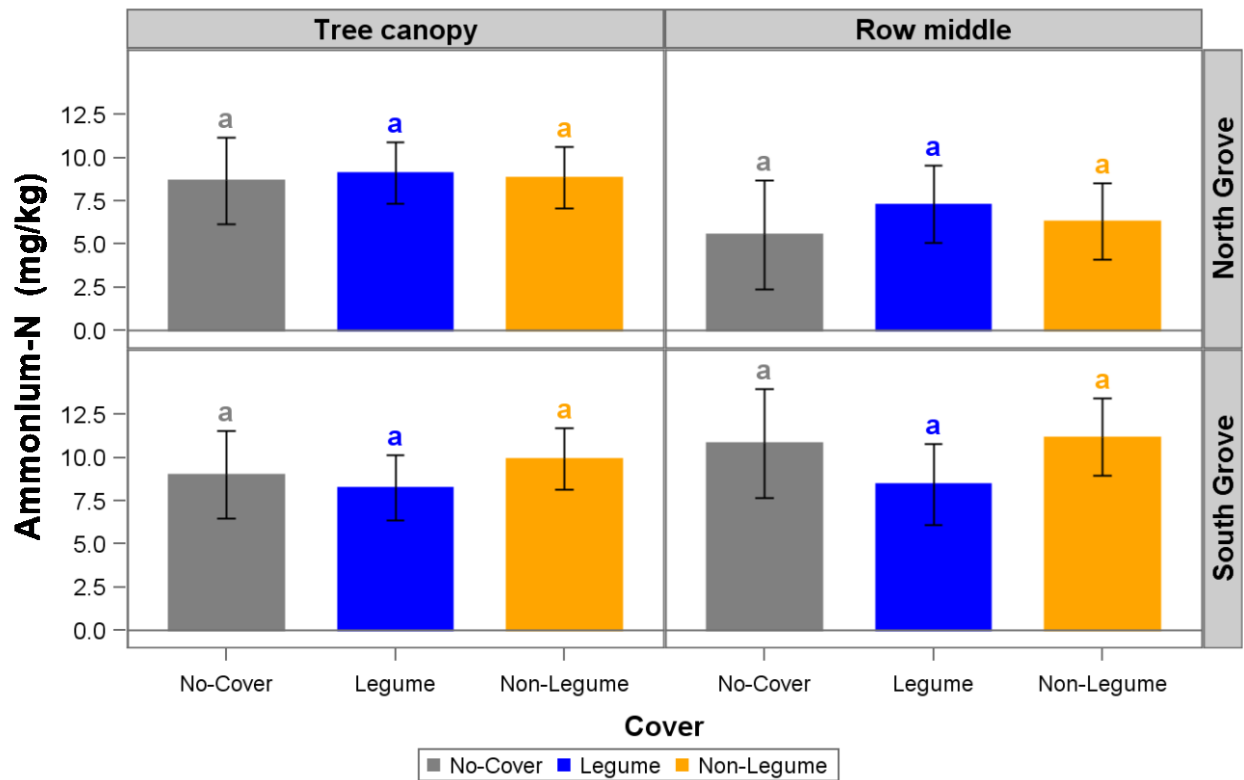

Figure S4: Soil ammonium-nitrogen concentration in the row middles and under the tree canopy in the North and South Groves. Treatments included legume (LG+NL), non-legume (NL), and no cover (control, no-cover cropped). Error bars represent 95% confidence limits based on 12 replicates. Treatments within a cell sharing a given letter are not statistically different at  $P \leq 0.05$  based on the least significant difference (LSD) (simple two-sample t-test).

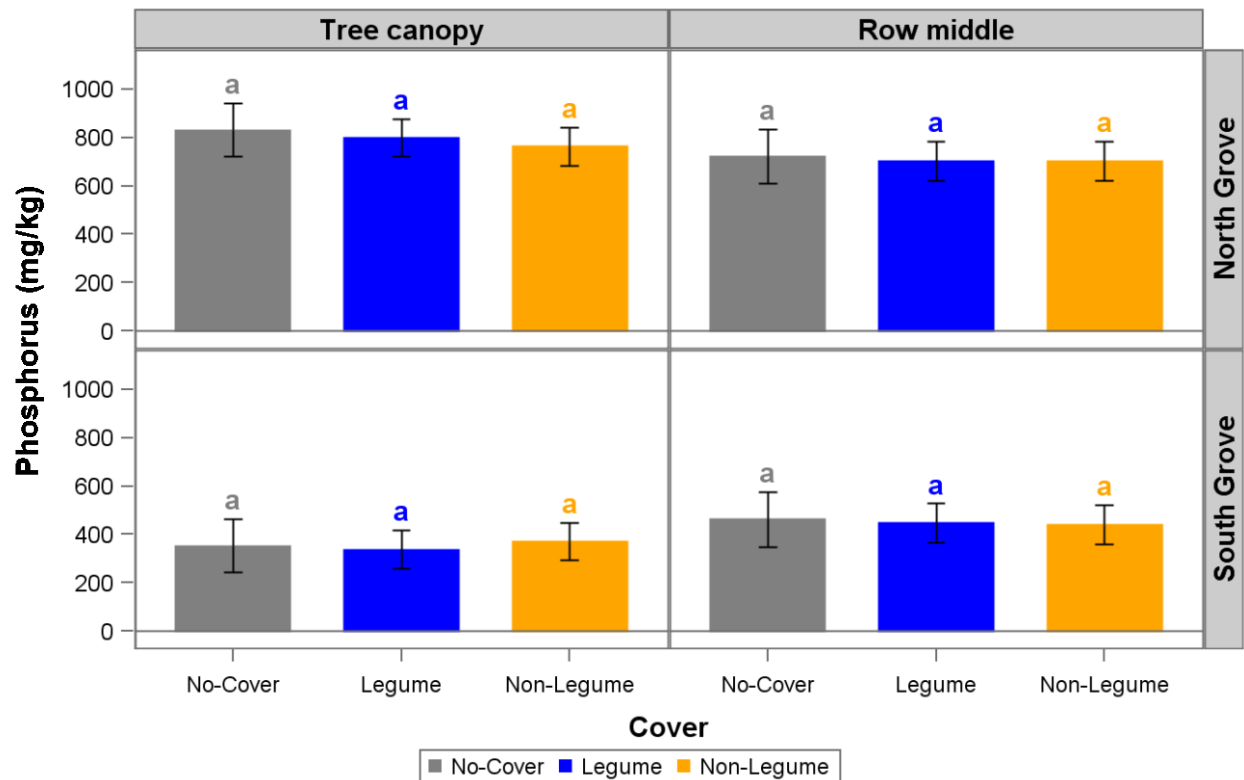

Figure S5: Soil phosphorus concentration in the row middles and under the tree canopy in the North and South Groves. Treatments include legume (LG+NL), non-legume (NL), and no cover (control, no-cover cropped). Error bars represent 95% confidence limits based on 12 replicates. Treatments within a cell sharing a given letter are not statistically different at  $P \leq 0.05$  based on the least significant difference (LSD) (simple two-sample t-test).

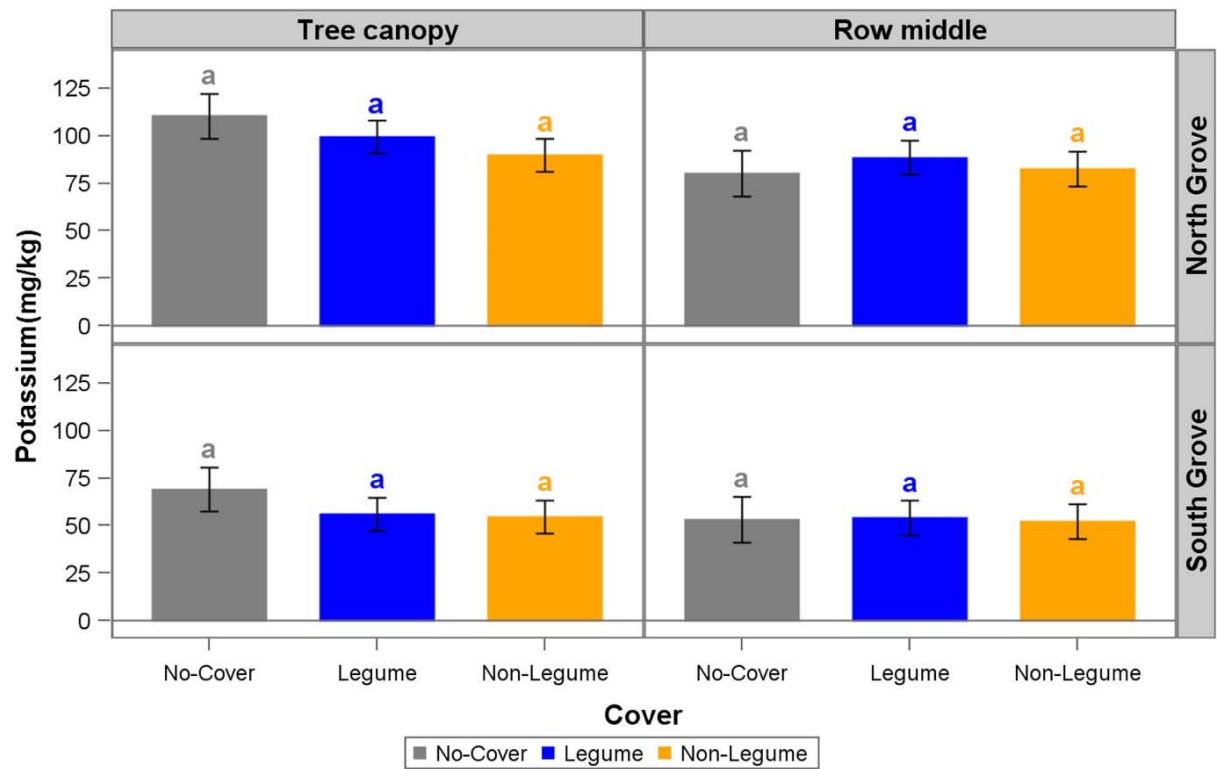

Figure S6: Soil potassium concentration in the row middles and under the tree canopy in the North and South Groves. Treatments include legume (LG+NL), non-legume (NL), and no cover (control, no-cover cropped). Error bars represent 95% confidence limits based on 12 replicates. Treatments within a cell sharing a given letter are not statistically different at  $P \leq 0.05$  based on the least significant difference (LSD) (simple two-sample t-test).

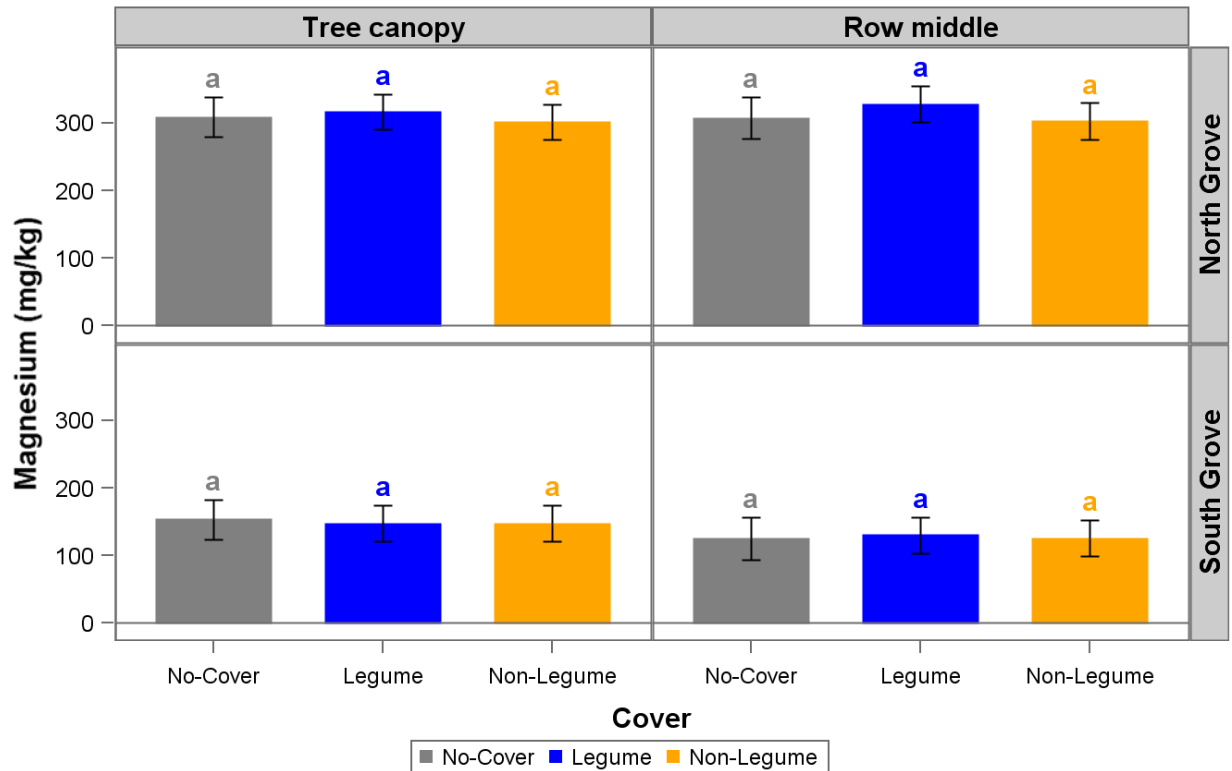

Figure S7: Soil magnesium concentration in the row middles and under the tree canopy in the North and South Groves. Treatments include legume (LG+NL), non-legume (NL), and no cover (control, no-cover cropped). Error bars represent 95% confidence limits based on 12 replicates. Treatments within a cell sharing a given letter are not statistically different at  $P \leq 0.05$  based on the least significant difference (LSD) (simple two-sample t-test).

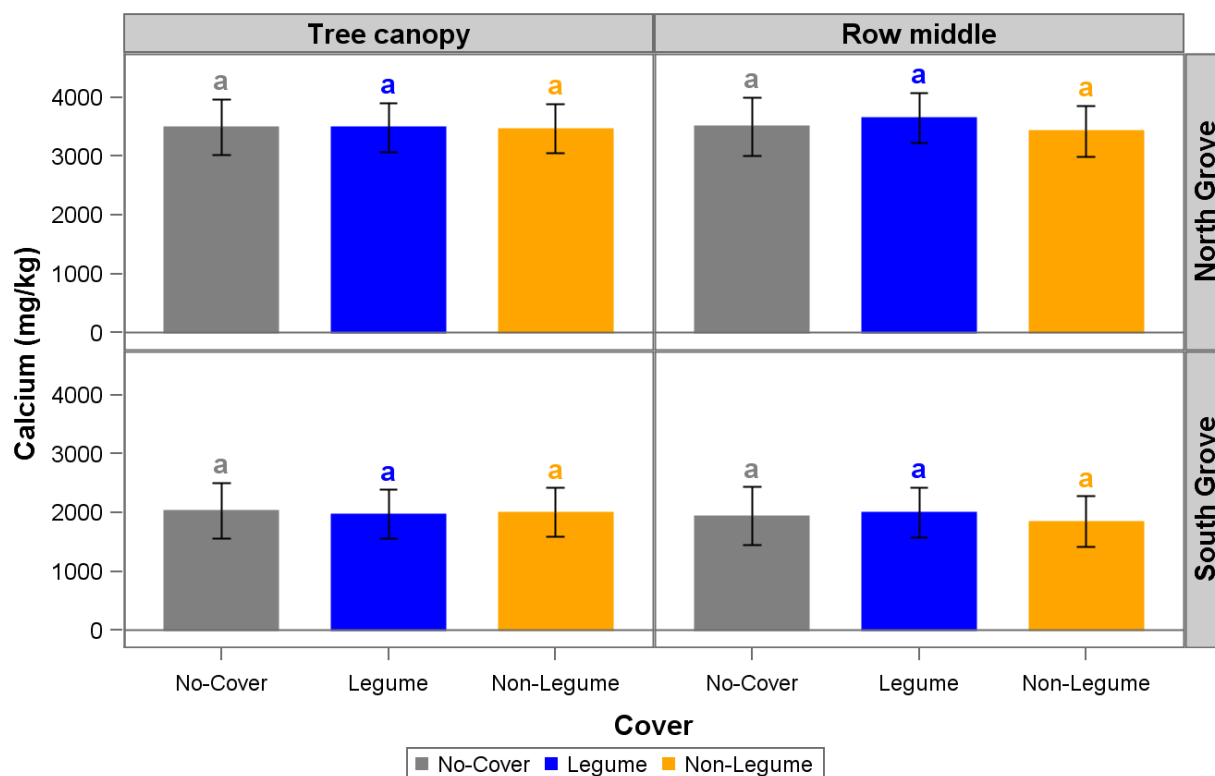

Figure S8: Soil calcium concentration in the row middles and under the tree canopy in the North and South Groves. Treatments include legume (LG+NL), non-legume (NL), and no cover (control, no-cover cropped). Error bars represent 95% confidence limits based on 12 replicates. Treatments within a cell sharing a given letter are not statistically different at  $P \leq 0.05$  based on the least significant difference (LSD) (simple two-sample t-test).



Table S1: Analysis of variance (ANOVA) for P, Ca, Mg, NH<sub>4</sub><sup>+</sup>-N, NO<sub>3</sub><sup>-</sup>-N, and organic matter (OM) concentration in the soil.

| Source                       | DF | P                | Ca  | Mg  | NH <sub>4</sub> <sup>+</sup> | NO <sub>3</sub> <sup>-</sup> -N | OM  |
|------------------------------|----|------------------|-----|-----|------------------------------|---------------------------------|-----|
| Site                         | 1  | *** <sup>1</sup> | *** | *** | ***                          | ***                             | *** |
| Treatment                    | 2  | ns               | ns  | ns  | ns                           | ns                              | **  |
| Site*Treatment               | 2  | ns               | ns  | ns  | ns                           | ns                              | ns  |
| Location                     | 1  | ns               | ns  | ns  | ***                          | ns                              | *** |
| Site*Location                | 1  | ***              | ns  | *   | ***                          | **                              | *** |
| Treatment*Location           | 2  | ns               | ns  | ns  | *                            | ns                              | ns  |
| Site*Treatment*Location      | 2  | ns               | ns  | ns  | ns                           | *                               | **  |
| Year                         | 3  | ***              | ns  | *** | ***                          | ***                             | *** |
| Site*Year                    | 3  | ***              | ns  | *** | ns                           | ***                             | ns  |
| Treatment*Year               | 6  | ns               | ns  | ns  | ns                           | ns                              | ns  |
| Site*Treatment*Year          | 6  | ns               | ns  | ns  | ns                           | ns                              | ns  |
| Location*Year                | 3  | ***              | ns  | *** | ***                          | ***                             | *** |
| Site*Location*Year           | 3  | ***              | ns  | *** | ***                          | ***                             | *** |
| Treatment*Location*Year      | 6  | *                | ns  | ns  | ns                           | ns                              | ns  |
| Site*Treatment*Location*Year | 6  | ns               | ns  | ns  | ns                           | ns                              | ns  |

<sup>1</sup>ns, \*, \*\*, \*\*\* imply not significant at P=0.05, and significant at P-value 0.05, 0.01, and 0.001, respectively.
